1 **Detection of hemagglutinin H5 influenza A virus sequence in municipal**  
2 **wastewater solids at wastewater treatment plants with increases in influenza A in**  
3 **spring, 2024**

4  
5 Marlene K. Wolfe<sup>1</sup>, Dorothea Duong<sup>2</sup>, Bridgette Shelden<sup>2</sup>, Elana M. G. Chan<sup>3</sup>, Vikram  
6 Chan-Herur<sup>2</sup>, Stephen Hilton<sup>1</sup>, Abigail Harvey Paulos<sup>1</sup>, Alessandro Zulli<sup>3</sup>, Bradley J.  
7 White<sup>2</sup>, Alexandria B. Boehm<sup>3\*</sup>

8  
9 1. Gangarosa Department of Environmental Health, Rollins School of Public Health,  
10 Emory University, 1518 Clifton Rd, Atlanta, GA, USA, 30322  
11 2. Verily Life Sciences LLC, South San Francisco, CA, USA  
12 3. Department of Civil and Environmental Engineering, Stanford University, 473 Via  
13 Ortega, Stanford, California, 94305

14  
15 \*Corresponding author: [aboehm@stanford.edu](mailto:aboehm@stanford.edu), 650-724-9128

16  
17

18 **Abstract**

19 Prospective influenza A (IAV) RNA monitoring at 190 wastewater treatment plants across the  
20 US identified increases in IAV RNA concentrations at 59 plants in spring 2024, after the typical  
21 seasonal influenza period, coincident with the identification of highly pathogenic avian influenza  
22 (subtype H5N1) circulating in dairy cattle in the US. We developed and validated a hydrolysis-  
23 probe RT-PCR assay for quantification of the H5 hemagglutinin gene. We applied it  
24 retrospectively to samples from three plants where springtime increases were identified. The H5  
25 marker was detected at all three plants coinciding with the increases. Plants were located in a  
26 state with confirmed outbreaks of highly pathogenic avian influenza, H5N1 clade 2.3.4.4b, in  
27 dairy cattle. Concentrations of the H5 gene approached overall influenza A virus gene  
28 concentrations, suggesting a large fraction of IAV inputs were H5 subtypes. At two of the  
29 wastewater plants, industrial discharges containing animal waste, including milk byproducts,  
30 were permitted to discharge into sewers. Our findings demonstrate wastewater monitoring can  
31 detect animal-associated influenza contributions, and highlight the need to consider industrial  
32 and agricultural inputs into wastewater. This work illustrates wastewater monitoring's value for  
33 comprehensive influenza surveillance for diseases with zoonotic potential across human and  
34 animal populations.

35

36

## 37 Introduction

38 Respiratory infections are the fourth largest cause of death worldwide<sup>1-3</sup>. Among these,  
39 influenza viruses are one of the most common causes of viral epidemics of respiratory  
40 infection, with an estimated one billion cases each year<sup>4</sup>. In recent years, a majority of  
41 these influenza infections have been caused by Influenza A virus (IAV)<sup>5</sup>, which has  
42 been responsible for all global epidemics of influenza. Influenza A viruses are found in  
43 both humans and animals; H5N1 influenza is a highly pathogenic avian influenza (HPAI)  
44 that emerged in the late 1990s and has become widespread in wild birds and has  
45 zoonotic potential. A new H5N1 clade (2.3.4.4b) has caused widespread outbreaks  
46 since 2022<sup>6</sup>. Tens of millions of chickens have been culled in the US to control  
47 outbreaks, and there is a threat of zoonotic transmission to humans. In 2024 this  
48 outbreak spread to dairy cattle and was associated with one known human case, the  
49 second case of HPAI documented in the United States<sup>6</sup>.

50  
51 Wastewater surveillance of influenza A has been implemented across the United  
52 States, and concentrations of viral RNA in wastewater have been shown to align with  
53 clinical surveillance metrics including influenza-like illness, influenza hospitalizations,  
54 and deaths.<sup>7-10</sup> As a result, it is becoming a routine public health tool for influenza  
55 outbreaks and provides low-cost, real-time, population level data on influenza  
56 outbreaks, particularly in locations with limited clinical testing<sup>11</sup>. The utility of these data  
57 and responses are predicated on the assumption that the majority of the contributions to  
58 these measurements are from human sources, rather than influenzas with zoonotic  
59 potential such as H5N1 and H7N9<sup>12,13</sup>. Recent increases in the spread of HPAI to new  
60 species, particularly subtype H5N1 clade 2.3.4.4b spread in dairy cattle<sup>6</sup>, have raised  
61 questions about wastewater contributions from avian and bovine sources<sup>14,15</sup>.

62  
63 Studies have demonstrated the potential for subtyping circulating IAV directly from  
64 wastewater samples<sup>7,16</sup>. IAV subtypes are differentiated by two main surface  
65 glycoproteins, hemagglutinin (HA) and the neuraminidase (NA)<sup>17</sup>. We previously applied  
66 hydrolysis probe-based RT-PCR assays for H1, H3, N1, and N2 to wastewater to  
67 identify circulating IAV subtypes. However, to date, a hydrolysis probe-based RT-PCR  
68 assay for the H5 marker in IAV has not been applied to wastewater.

69  
70 In this study, we use prospective measurements of IAV M gene, which detects all IAV  
71 subtypes, in wastewater solids from 190 wastewater treatment plants (WWTPs) to  
72 identify WWTP showing springtime increases in IAV concentrations after the typical  
73 influenza season ends, coincident with the identification and spread of HPAI in animal  
74 populations in the US. We developed a novel RT-PCR hydrolysis-probe assay to detect  
75 the H5 subtype of IAV. After assay validation, we applied it to samples to measure

76 concentrations of the H5 marker retrospectively from three wastewater treatment plants  
77 located near the apparent epicenter of the HPAI outbreak.

## 78 **Methods**

79 **H5 assay design.** Influenza A H5 subtype genome sequences were downloaded from  
80 the National Center for Biotechnology Information (NCBI) in Feb 2023 and  
81 supplemented with additional newer sequences available from NCBI and GISAID in  
82 April 2024. Sequences were aligned, and primers and probes were designed to target  
83 the hemagglutinin (HA) gene using Primer3Plus. Parameters used in assay  
84 development (eg, sequence length and GC content) are provided elsewhere<sup>10</sup>. The  
85 forward primer is: TATAGARGGAGGATGGCAGG, reverse primer:  
86 ACDGCCTCAAAYTGAGTGTT, and probe: AGGGGAGTGGKTACGCTGCRGAC (also  
87 in Table S1, Figure S1). The primers and probes were confirmed to be specific and  
88 sensitive for influenza A containing the H5 subtype of the HA gene *in silico* using NCBI  
89 BLAST.

90  
91 The assay was tested *in vitro* against nucleic acids from a large collection of respiratory  
92 pathogens (Table S2) including non-H5 influenza subtypes. When panels were  
93 composed of whole viruses or bacteria, their nucleic-acids were extracted and purified  
94 as described below for the wastewater solids samples and then used neat as template  
95 in droplet digital RT-PCR assays. Assays were run in a single well using the cycling  
96 conditions and post processing using a droplet reader as described below for the  
97 wastewater samples in singleplex. Synthetic nucleic acid gene blocks purchased from  
98 IDT (Coralville, Iowa) were used as a positive control for the H5 marker.

99  
100 **Prospective IAV M gene testing in wastewater.** Wastewater samples were obtained  
101 from 190 wastewater treatment plants located in 41 states for a prospective wastewater  
102 monitoring project. Samples are collected 3 to 7 times per week between 7/1/23 and  
103 4/22/24 (month/day/year format, n=19,323). Samples are shipped overnight to the  
104 laboratory at 4°C where they were processed immediately. During the time between  
105 sample collection and transport (0-3 days), we expect minimal losses of the RNA target  
106 based on results of IAV RNA persistence studies<sup>18</sup>. Upon receipt of the laboratory,  
107 samples are processed immediately to measure IAV M gene and PMMoV gene  
108 concentrations in the solid fraction of wastewater. Since the methods are described in  
109 detail in several different publications<sup>8,19</sup>, they are not provided in detail here. PMMoV is  
110 an endogenous plant virus present in wastewater and serves as an internal process  
111 control. Briefly, solids are isolated from the samples, suspended in a buffer at a low  
112 enough concentration so as to minimize inhibition<sup>19</sup>, and subjected to nucleic-acid  
113 extraction and purification (Chemagic Viral DNA/RNA 300 Kit H96, PerkinElmer,  
114 Shelton, CT), and inhibitor removal (Zymo OneStep PCR Inhibitor Removal Kit, Irvine,

115 CA). Nucleic-acids from 6 to 10 aliquots of each sample are obtained and each used  
116 neat as template in 6 to 10 replicate droplet digital RT-PCR reaction wells to measure  
117 IAV and 1:100 diluted in 2 to 10 replicate wells to measure PMMoV. The process  
118 includes negative and positive extraction and PCR controls, as well as a measure of  
119 recovery as determined from spiking exogenous bovine coronavirus. The M gene target  
120 is present in all subtypes of IAV including the H5N1 subtype and the current circulating  
121 clade 2.3.4.4b. Concentrations are expressed as copies per gram dry weight. After  
122 obtaining these measurements, nucleic acids are biobanked at -80°C.

123

124 **Retrospective Influenza A M gene and H5 testing in wastewater.** Biobanked  
125 samples between February 4 and April 16, 2024 from two wastewater treatment plant  
126 (WWTP) sites of the City of Amarillo Water Utilities Division in Texas (hereafter  
127 described as the “North” and “South” sites in Potter/Randall County, TX), as well as a  
128 WWTP in Dallas County, Texas were used to measure concentrations of H5 marker  
129 (samples were biobanked for up to 2 months, Table S3 provides exact dates of samples  
130 run, n=78 samples). The Potter/Randall County City of Amarillo plants provide 24-hour  
131 composited influent samples and the Dallas County plant provides settled solids from  
132 the primary clarifier. Plants service areas with separate sanitary sewer systems. The  
133 South and North sites in Potter/Randall County and the Dallas County site serve  
134 approximately 60,000, 140,000, and 186,000 people. Several industries are permitted to  
135 discharge wastewater to both City of Amarillo Water Utilities Division sanitary sewer  
136 systems including animal product processing facilities.

137

138 Concentrations of the H5 marker and the IAV M gene were measured in multiplex using  
139 an AutoDG Automated Droplet Generator (Bio-Rad, Hercules, CA), Mastercycler Pro  
140 (Eppendorf, Enfield, CT) thermocycler, and a QX600 Droplet Reader (Bio-Rad). The  
141 IAV M gene was measured again in the biobanked samples to document potential RNA  
142 degradation. In addition an assay for the N gene of SARS-CoV-2 was included (results  
143 not provided herein). Primers and probes for all the assays were purchased from IDT  
144 (Coralville, Iowa). The H5 probe contained the fluorescent molecule FAM and the IAV M  
145 gene probe contained ROX; both probes also contained ZEN, a proprietary internal  
146 quencher from IDT; and IBFQ, Iowa Black FQ. Each of the 6 replicate nucleic-acid  
147 extractions obtained from each sample were run neat as template in their own RT-PCR  
148 well to measure the RNA targets. The cycling conditions were as follows: reverse  
149 transcription at 50 °C for 60 min, enzyme activation at 95 °C for 5 min, 40 cycles of  
150 denaturation at 95 °C for 30 s and annealing and extension at 59 °C for 30 s, enzyme  
151 deactivation at 98 °C for 10 min then an indefinite hold at 4 °C. The ramp rate for  
152 temperature changes were set to 2 °C/second and the final hold at 4 °C was performed  
153 for a minimum of 30 min to allow the droplets to stabilize. Droplets were analyzed using  
154 the QX600 Droplet Reader (Bio-Rad). A well had to have over 10,000 droplets for

155 inclusion in the analysis. All liquid transfers were performed using the Agilent Bravo  
156 (Agilent Technologies, Santa Clara, CA). Extraction and PCR positive and negative  
157 controls were run on each 96-well plate.

158  
159 Results from replicate wells were merged for analysis. Concentrations of the targets are  
160 presented as copies per gram dry weight. Dry weight was determined using an aliquot  
161 of solids and drying in an oven<sup>19</sup>. For a sample to be scored as a positive, there had to  
162 be at least 3 positive droplets. The lowest measurable concentration is approximately  
163 1000 copies/g dry weight. Errors are reported as standard deviations on the  
164 measurements as obtained from QX Manager Software (Bio-Rad, version 2.0).

165  
166 **Influenza clinical data.** Data on influenza-related emergency department visits by  
167 health district<sup>20</sup> and statewide influenza positivity rates<sup>21</sup> for Texas were obtained from  
168 publicly available data from the Texas Department of State Health Services.  
169 Potter/Randall County sites are within public health district 1, and the Dallas County site  
170 is within public health district 2/3.

171  
172 **Data analysis.** Across the 190 WWTPs in the prospective study, we identified onset  
173 and offset of IAV wastewater events using a previously published logic<sup>16</sup>. In short, IAV  
174 wastewater event onset occurred when all samples analyzed in the previous 14 days  
175 had concentrations of the IAV M gene  $\geq 2000$  cp/g and offset when less than or equal to  
176 50% of the samples collected in the previous 14 days had concentrations  $\geq 2000$  cp/g.  
177 Using this approach, we identified WWTPs that showed a secondary onset of IAV  
178 wastewater events after the typical seasonal wastewater event offset. We also visually  
179 examined IAV/PMMoV concentrations at WWTPs to subjectively identify those with a  
180 noticeable spike, or increasing trends in concentrations observed after February 2024  
181 when it was established that H5N1 was circulating.

## 182 **Results**

183 **Assay sensitivity and specificity and QA/QC.** Both *in silico* and *in vitro* testing  
184 indicated the H5 assay is 100% specific. *In vitro* tests returned non-detects for all non-  
185 target pathogens, including other influenza subtypes. The sensitivity of the assay is  
186 estimated to be 90% as 10% of the influenza A H5 subtype sequences in GISAID and  
187 NCBI have single nucleotide polymorphisms in the primer and probe regions. The H5  
188 assay detects the circulating H5N1 clade 2.3.4.4b.

189

190 Results are reported following Environmental Microbiology Minimal Information<sup>22</sup>  
191 (EMMI) guidelines (checklist available with all wastewater data at  
192 <https://purl.stanford.edu/tr782wk3364>). All positive and negative controls were positive  
193 and negative, respectively indicating no contamination. Nucleic-acid extraction  
194 efficiency for samples passed the quality control threshold of being over 0.1 for bovine  
195 coronavirus (median = 1.1, IQR = 0.8 - 1.5); recoveries greater than one are likely a  
196 result of errors associated with the measurements. PMMoV was detected at high  
197 concentrations in all samples (median of  $3.3 \times 10^8$ , IQR =  $1.9 \times 10^8$ - $6.4 \times 10^8$  cp/g) providing  
198 further support of efficient nucleic-acid extraction. We compared concentrations of IAV  
199 M gene in samples measured without any storage (during prospective monitoring) to  
200 those measured in the same biobanked samples; the median ratio of IAV M gene  
201 concentrations in biobanked to fresh samples was 1.3 (interquartile range 1.0 - 1.7,  
202 n=78) suggesting limited degradation of RNA during storage.

203

#### 204 **Springtime increases in IAV M gene concentrations in WWTPs across the US.**

205 Using the prospectively measured IAV RNA concentrations, we found, using all data  
206 available on 24 April, 2024, that 44 of the 190 WWTPs showed a secondary IAV onset  
207 event after their seasonal IAV event offset (Table S4); these are located across 18  
208 different states. There were 99 WWTPs for which the seasonal IAV wastewater event  
209 had not offset by the end of the data series; their IAV concentrations were visually  
210 examined for recent increases during March and April, and 15 locations (Table S3) were  
211 identified. Those 15 locations spanned 8 states. Example data from plants with distinct  
212 spring increases are shown in Figure S2.

213

214 **H5 marker prevalence in wastewater samples.** Given that increases in wastewater  
215 appear to be coincident with the identification of avian influenza circulating in the nation  
216 (Figure S2), we decided to investigate whether the H5 marker was present in samples  
217 from three “sentinel” WWTPs located in Texas where H5N1 was identified in cows<sup>14</sup>  
218 (Figure 1). We found that prior to early to mid-March (depending on the WWTP), the H5  
219 marker was non-detect in the wastewater solids. Subsequently, as IAV M gene  
220 increased at the WWTPs, H5 marker became detectable at similar concentrations to the  
221 IAV M gene. When detected, H5 concentration ranged from 5847 to 2,158,821 (median  
222 = 29,364) cp/g. The IAV M gene concentrations measured during this time period are  
223 among the highest ever measured in wastewater (Figure S3). In samples where H5 was  
224 detected, the median ratio to IAV M gene was 0.6 at all three plants (IQR at Duck Creek:  
225 0.6-0.6, Hollywood Road: 0.2 - 0.7, River Road: 0.4 - 0.8) During this time, influenza  
226 surveillance in Texas showed declined trends in influenza-related emergency  
227 department visits in the associated public health regions (Figure 2).

228

229

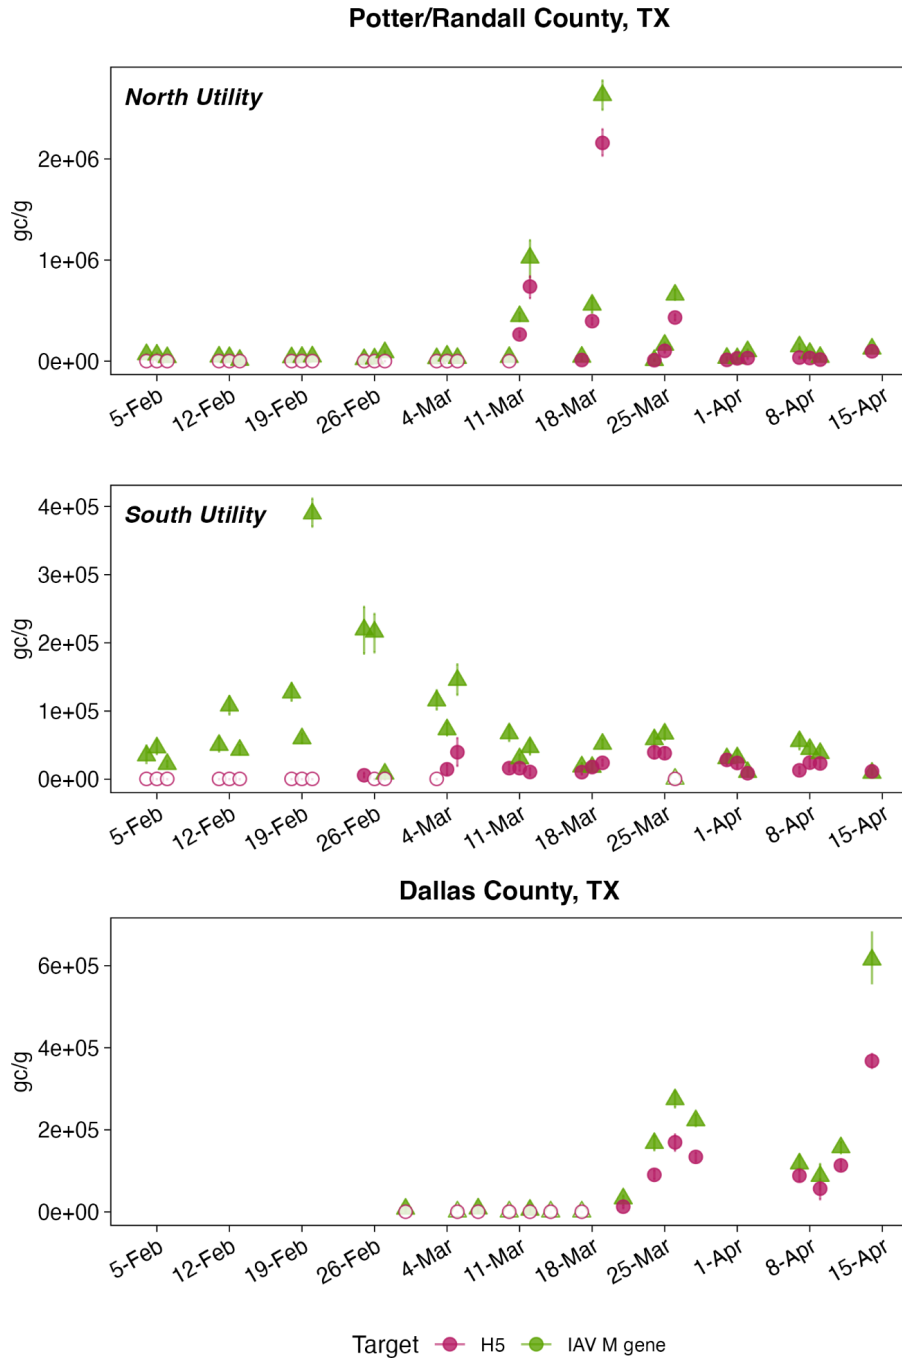

230  
 231 Figure 1. Concentrations of IAV M gene target (labeled as IAV, in green) as well as the  
 232 H5 marker (labeled H5) and associated standard error in units of copies per gram dry  
 233 weight; if error bars cannot be seen, then they are smaller than the symbols. Open  
 234 markers are below the lowest measurable concentration (1000 copies per gram dry  
 235 weight).

236  
 237



238

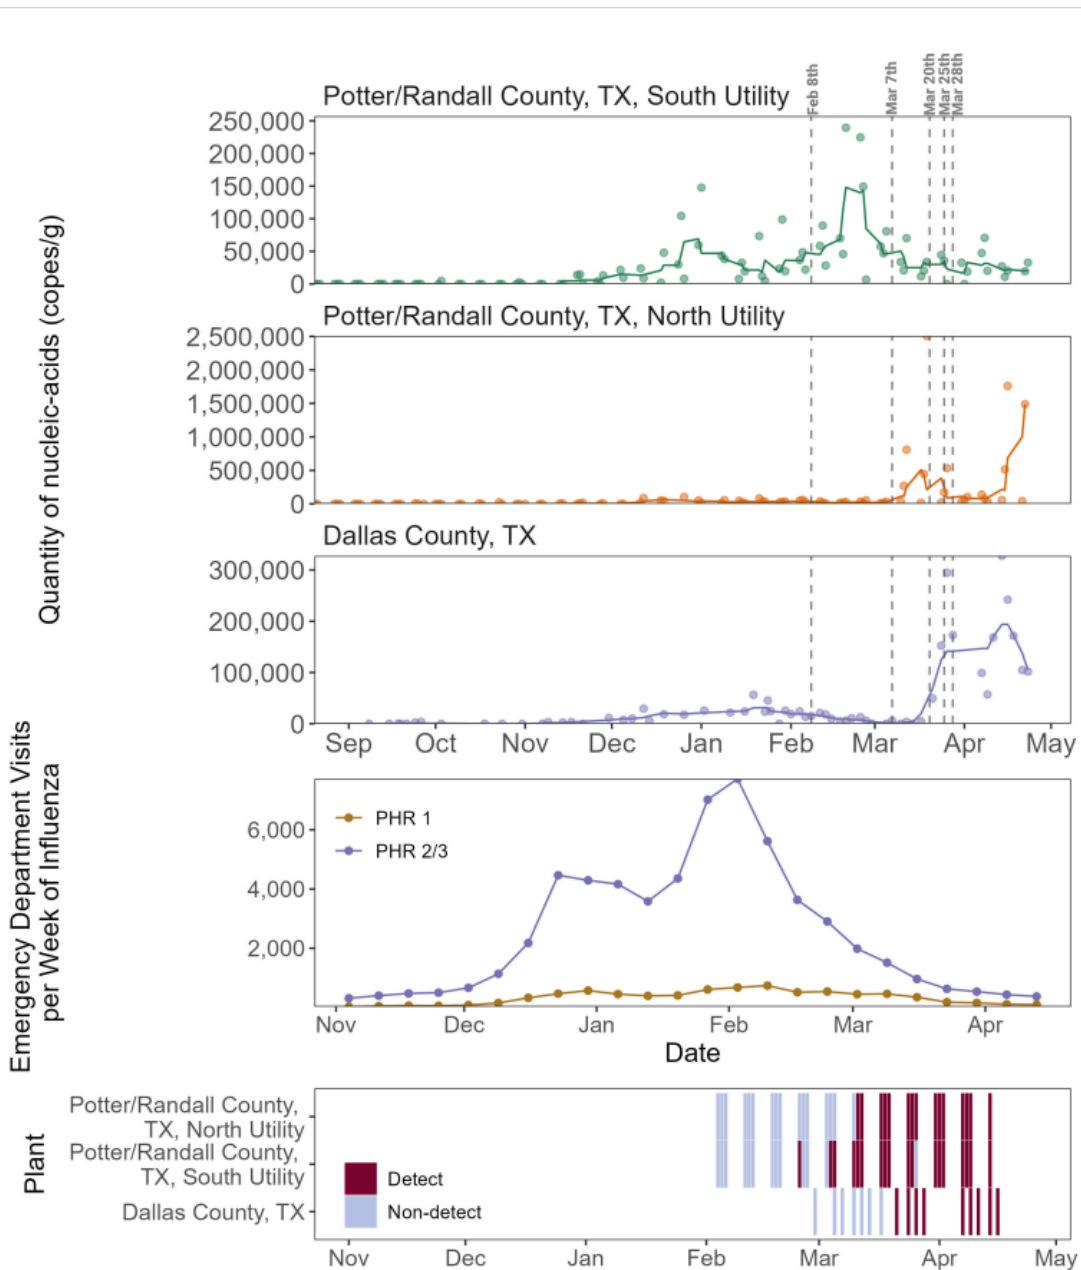

239

240 Figure 2. Top three panels. Concentrations of the IAV M gene in wastewater solids at the three WWTPs  
 241 in Texas, as measured in the prospective monitoring. Line represents the 5-adjacent sample trimmed  
 242 average, the symbols show the measured concentrations and the standard errors. Fourth panel from the  
 243 top shows emergency department visits per week for influenza; PHR 1 represents Texas Public Health  
 244 Region 1 (containing Potter/Randall Counties) and PHR2/3 represents Public Health Region 2/3  
 245 containing Dallas County. Bottom panel shows the presence or absence of the H5 marker in the samples  
 246 from the three plants. Vertical lines indicate key dates as follows. February 8, 2024 USDA declares  
 247 ongoing HPAI poultry outbreak, March 7, 2024: Unknown dairy cattle illness first reported, March 20,  
 248 2024: Samples collected from dairy cattle in Texas, March 25, 2024: Texas confirms H5N1 in dairy cattle,  
 249 March 28, 2024: Positive H5N1 specimen collected from human.

## 250 Discussion

251 H5 influenza RNA was readily detected in wastewater solids at sites with atypical  
252 increases in influenza A M gene concentrations in March and April 2024 during a period  
253 of a known H5N1 outbreak in the US. The presence of H5 in municipal wastewater  
254 indicates that contributions into the wastewater system include excretions or byproducts  
255 containing influenza viral RNA with an H5 subtype, but do not indicate the species that  
256 may be shedding an H5 influenza. During March and April 2024, increases in IAV M  
257 gene concentrations at these plants were not associated with increases in human  
258 influenza activity, as documented by the emergency room influenza case data in Texas.  
259 However, both the increases in M gene concentrations and H5 detection occurred  
260 immediately prior to and during reported outbreaks of H5N1 in dairy cattle in the  
261 region<sup>14</sup>. These results suggest that wastewater monitoring is a viable method of  
262 monitoring certain animal pathogens, and can provide a leading edge of detection that  
263 is of particular importance for diseases with zoonotic potential like HPAI.

264  
265 **Hypothesized sources of H5.** H5N1 outbreaks in dairy cattle were reported on March  
266 25, 2024 in the Texas panhandle<sup>23</sup>, which contains the Potter/Randall County area.  
267 There was also a human case of H5N1 reported in Amarillo, TX, in an individual who  
268 worked at a commercial dairy cattle farm and reported close proximity to dairy cows<sup>24</sup>.  
269 As of April 25, 2024, no outbreaks have been reported within the vicinity of Sunnyvale,  
270 TX. Although no H5N1 outbreaks have been reported within the sewersheds of the  
271 WWTPs in this study, both City of Amarillo Water Utilities Division receive effluent from  
272 industries handling animal bioproducts, including dairies that receive milk from across  
273 the region and beef processing plants (personal communication from local staff). At  
274 least one dairy processing site is also permitted within the Dallas County sewershed  
275 area. Dairy cattle have been reported to shed H5N1, as well as other viruses, in milk in  
276 high quantities<sup>25,26</sup>. During the current outbreak, H5N1 has been detected in both raw  
277 and pasteurized milk, according to USDA<sup>27</sup>. Pasteurization is expected to inactivate the  
278 virus, although it may still be detectable as non-infectious genetic material can persist  
279 past pasteurization<sup>28</sup>. Regardless of whether milk or milk products entering the sewer  
280 system have undergone pasteurization or pre-treatment before they are discharged, our  
281 methods detect viral nucleic acids and their detection does not imply viability.

282  
283 Given the outbreaks in dairy milking cattle in the region<sup>14</sup>, reports of H5N1 shedding in  
284 cow milk and detection in milk products on the shelf, and animal industry contributions  
285 into wastewater at the three utilities, we hypothesize that dairy processing discharge  
286 into the sewage system is driving the detection of H5 identified in wastewater solids. It is  
287 important to note that, even if true, this does not eliminate the possibility of contributions  
288 from other animals, including humans. If dairy industry activities in these sewersheds  
289 are a primary source of H5 in wastewater, this suggests that there are may be

290 additional, unidentified outbreaks among cattle with milk sent to these facilities since  
291 milk from infected animals is required to be diverted from food supply.

292  
293 **Limitations.** The assay used here detects H5 broadly, and as such is not specific to  
294 H5N1 or HPAI, and may include other, low pathogenic H5 influenza viruses (although  
295 these are not expected to be circulating in these areas at this time<sup>29</sup>). HPAI genomes  
296 contain one copy each of M and HA genes, so results of the assays should be  
297 comparable, barring potential variability in assay performance and measurement errors.  
298 Caution should be taken in interpreting these results for characterizing the current H5N1  
299 outbreak; without isolating possible sources in the sewer network of the H5  
300 contributions our hypotheses about the source of the signal cannot be fully  
301 substantiated. However, multiple lines of evidence suggest animal sources.

302  
303 This work shows that wastewater monitoring can provide an early warning for outbreaks  
304 likely to produce contributions to the sewershed outside of the expected human-  
305 associated inputs, including for animal outbreaks of diseases with zoonotic potential. In  
306 Potter/Randall County, retrospective testing shows that H5 was detectable in  
307 wastewater on Mar 1, 2024 - nearly a week before an unspecified disease was reported  
308 in dairy cattle in Texas (Mar 7) and several weeks before the causative agent was  
309 identified as H5N1 (Mar 25). Understanding and describing industry inputs into  
310 municipal wastewater, especially those that may be associated with contributions from  
311 animals, is critical both to identifying anomalies in influenza data from wastewater that  
312 do not relate to human disease, and identifying cases when wastewater can provide  
313 important, early warning data on outbreaks with zoonotic potential. Future work should  
314 further explore the possible contributions of animal shedding to municipal wastewater  
315 systems, and seek to sequence influenza A in wastewater to support genomic  
316 surveillance.

317  
318 **Acknowledgements.** We acknowledge Todd Bell, Casie Stoughton, Jason Williams,  
319 Steve Kean, Richard Gibson, Tyler Edwards, Garry Singer, and Megan Sandefer for  
320 their assistance with the project.

321  
322 **Data availability statement.** All wastewater data are available at the Stanford Digital  
323 Repository: <https://purl.stanford.edu/tr782wk3364>.

324  
325 **Supporting information.** Additional methods, Figure S1, S2, and S3, and Tables S1,  
326 S2, S3, and S4.

327 **References**

328

- 329 (1) World Health Organization. *The top 10 causes of death*. [https://www.who.int/news-](https://www.who.int/news-room/fact-sheets/detail/the-top-10-causes-of-death)  
330 [room/fact-sheets/detail/the-top-10-causes-of-death](https://www.who.int/news-room/fact-sheets/detail/the-top-10-causes-of-death) (accessed 2024-04-25).
- 331 (2) National Center for Health Statistics, CDC. *Deaths and Mortality*.  
332 <https://www.cdc.gov/nchs/fastats/deaths.htm> (accessed 2024-04-25).
- 333 (3) Raj, D.; Rao Mallyala, S.; Chirumamilla, A.; Gajjar, J.; Patel, S.; Dekhne, A.; Dineshbhai  
334 Desai, H. 2595. Burden of Lower Respiratory Tract Infection in United States of America  
335 and Its Trend from 1990-2019: A Benchmarking Analysis from the Global Burden of Disease  
336 Study. *Open Forum Infect. Dis.* **2023**, *10* (Supplement\_2), ofad500.2210.  
337 <https://doi.org/10.1093/ofid/ofad500.2210>.
- 338 (4) Centers for Disease Control and Prevention. *Influenza (Seasonal)*.  
339 [https://www.who.int/news-room/fact-sheets/detail/influenza-\(seasonal\)](https://www.who.int/news-room/fact-sheets/detail/influenza-(seasonal)) (accessed 2024-04-  
340 25).
- 341 (5) Centers for Disease Control and Prevention. *Types of Influenza Viruses*.  
342 <https://www.cdc.gov/flu/about/viruses/types.htm> (accessed 2024-04-25).
- 343 (6) Centers for Disease Control and Prevention. *Highlights in the History of Avian Influenza*  
344 *(Bird Flu) Timeline – 2020-2024*. [https://www.cdc.gov/flu/avianflu/timeline/avian-timeline-](https://www.cdc.gov/flu/avianflu/timeline/avian-timeline-2020s.htm)  
345 [2020s.htm](https://www.cdc.gov/flu/avianflu/timeline/avian-timeline-2020s.htm) (accessed 2024-04-25).
- 346 (7) Mercier, E.; D’Aoust, P. M.; Thakali, O.; Hegazy, N.; Jia, J.-J.; Zhang, Z.; Eid, W.; Plaza-  
347 Diaz, J.; Kabir, M. P.; Fang, W.; Cowan, A.; Stephenson, S. E.; Pisharody, L.; MacKenzie,  
348 A. E.; Graber, T. E.; Wan, S.; Delatolla, R. Municipal and Neighbourhood Level Wastewater  
349 Surveillance and Subtyping of an Influenza Virus Outbreak. *Sci. Rep.* **2022**, *12* (1), 15777.  
350 <https://doi.org/10.1038/s41598-022-20076-z>.
- 351 (8) Schoen, M. E.; Bidwell, A. L.; Wolfe, M. K.; Boehm, A. B. United States Influenza 2022–  
352 2023 Season Characteristics as Inferred from Wastewater Solids, Influenza Hospitalization,  
353 and Syndromic Data. *Environ. Sci. Technol.* **2023**, *57* (49), 20542–20550.  
354 <https://doi.org/10.1021/acs.est.3c07526>.
- 355 (9) Wolfe, M. K.; Duong, D.; Bakker, K. M.; Ammerman, M.; Mortenson, L.; Hughes, B.; Arts, P.;  
356 Lauring, A. S.; Fitzsimmons, W. J.; Bendall, E.; Hwang, C. E.; Martin, E. T.; White, B. J.;  
357 Boehm, A. B.; Wigginton, K. R. Wastewater-Based Detection of Two Influenza Outbreaks.  
358 *Environ. Sci. Technol. Lett.* **2022**, *9* (8), 687–692.  
359 <https://doi.org/10.1021/acs.estlett.2c00350>.
- 360 (10) Boehm, A. B.; Hughes, B.; Duong, D.; Chan-Herur, V.; Buchman, A.; Wolfe, M. K.;  
361 White, B. J. Wastewater Concentrations of Human Influenza, Metapneumovirus,  
362 Parainfluenza, Respiratory Syncytial Virus, Rhinovirus, and Seasonal Coronavirus Nucleic-  
363 Acids during the COVID-19 Pandemic: A Surveillance Study. *Lancet Microbe* **2023**, *4* (5),  
364 e340–e348. [https://doi.org/10.1016/S2666-5247\(22\)00386-X](https://doi.org/10.1016/S2666-5247(22)00386-X).
- 365 (11) Rolfes, M. A.; Foppa, I. M.; Garg, S.; Flannery, B.; Brammer, L.; Singleton, J. A.; Burns,  
366 E.; Jernigan, D.; Olsen, S. J.; Bresee, J.; Reed, C. Annual Estimates of the Burden of  
367 Seasonal Influenza in the United States: A Tool for Strengthening Influenza Surveillance  
368 and Preparedness. *Influenza Other Respir. Viruses* **2018**, *12* (1), 132–137.  
369 <https://doi.org/10.1111/irv.12486>.
- 370 (12) Yamaji, R.; Saad, M. D.; Davis, C. T.; Swayne, D. E.; Wang, D.; Wong, F. Y. K.;  
371 McCauley, J. W.; Peiris, J. S. M.; Webby, R. J.; Fouchier, R. A. M.; Kawaoka, Y.; Zhang, W.  
372 Pandemic Potential of Highly Pathogenic Avian Influenza Clade 2.3.4.4 A(H5) Viruses. *Rev.*  
373 *Med. Virol.* **2020**, *30* (3), e2099. <https://doi.org/10.1002/rmv.2099>.
- 374 (13) World Health Organization. *Avian influenza A (H7N9)*.  
375 [https://www.who.int/emergencies/situations/avian-influenza-a-\(h7n9\)-virus-outbreak](https://www.who.int/emergencies/situations/avian-influenza-a-(h7n9)-virus-outbreak)  
376 (accessed 2024-04-25).
- 377 (14) U.S. DEPARTMENT OF AGRICULTURE. *Highly Pathogenic Avian Influenza (HPAI)*  
378 *Detections in Livestock*. [https://www.aphis.usda.gov/livestock-poultry-disease/avian/avian-](https://www.aphis.usda.gov/livestock-poultry-disease/avian/avian-influenza/hpai-detections/livestock)  
379 [influenza/hpai-detections/livestock](https://www.aphis.usda.gov/livestock-poultry-disease/avian/avian-influenza/hpai-detections/livestock) (accessed 2024-04-25).

- 380 (15) Center for Disease Control. *Current H5N1 Bird Flu Situation in Dairy Cows*.  
381 <https://www.cdc.gov/flu/avianflu/mammals.htm> (accessed 2024-04-25).
- 382 (16) Boehm, A. B.; Wolfe, M. K.; White, B. J.; Hughes, B.; Duong, D.; Bidwell, A. More than a  
383 Triple-demic: Influenza A Virus, Respiratory Syncytial Virus, SARS-CoV-2, and Human  
384 Metapneumovirus in Wastewater during Winter 2022–2023. *Environ. Sci. Technol. Lett.*  
385 **2023**, *10* (8), 622–627. <https://doi.org/10.1021/acs.estlett.3c00385>.
- 386 (17) Bouvier, N. M.; Palese, P. The Biology of Influenza Viruses. *Influenza Vaccines Res.*  
387 *Dev. Public Health Chall.* **2008**, *26*, D49–D53.  
388 <https://doi.org/10.1016/j.vaccine.2008.07.039>.
- 389 (18) Zhang Mengyang; Roldan-Hernandez Laura; Boehm Alexandria. Persistence of Human  
390 Respiratory Viral RNA in Wastewater-Settled Solids. *Appl. Environ. Microbiol.* **2024**, *90* (4),  
391 e02272-23. <https://doi.org/10.1128/aem.02272-23>.
- 392 (19) Boehm, A. B.; Wolfe, M. K.; Wigginton, K. R.; Bidwell, A.; White, B. J.; Hughes, B.;  
393 Duong; Chan-Herur, V.; Bischel, H. N.; Naughton, C. C. Human Viral Nucleic Acids  
394 Concentrations in Wastewater Solids from Central and Coastal California USA. *Sci. Data*  
395 **2023**, *10*, 396.
- 396 (20) Texas Health and Human Services. *Texas Respiratory Illness Interactive Dashboard*.  
397 <https://texas-respiratory-illness-dashboard-txdshsea.hub.arcgis.com/> (accessed 2024-04-  
398 25).
- 399 (21) Texas Health and Human Services. *Texas Respiratory Virus Surveillance Report 2023-  
400 2024 Season/ 2024 MMWR Week 15*.  
401 [https://www.dshs.texas.gov/sites/default/files/IDCU/disease/respiratory\\_virus\\_surveillance/2  
402 024/2024Week15TRVS-Final-pubApr19.pdf](https://www.dshs.texas.gov/sites/default/files/IDCU/disease/respiratory_virus_surveillance/2024/2024Week15TRVS-Final-pubApr19.pdf) (accessed 2024-04-25).
- 403 (22) Borchardt, M. A.; Boehm, A. B.; Salit, M.; Spencer, S. K.; Wigginton, K. R.; Noble, R. T.  
404 The Environmental Microbiology Minimum Information (EMMI) Guidelines: qPCR and dPCR  
405 Quality and Reporting for Environmental Microbiology. *Environ. Sci. Technol.* **2021**, *55* (15),  
406 10210–10223. <https://doi.org/10.1021/acs.est.1c01767>.
- 407 (23) NBC News. *Bird flu confirmed in cows at three Texas Panhandle dairies*.  
408 [https://www.nbcdfw.com/news/local/texas-news/bird-flu-texas-panhandle-dairy/3497786/  
409 \(accessed 2024-04-26\).](https://www.nbcdfw.com/news/local/texas-news/bird-flu-texas-panhandle-dairy/3497786/)
- 410 (24) Centers for Disease Control and Prevention. *Highly Pathogenic Avian Influenza A  
411 (H5N1) Virus Infection Reported in a Person in the U.S.*  
412 <https://www.cdc.gov/media/releases/2024/p0401-avian-flu.html> (accessed 2024-04-25).
- 413 (25) Sreenivasan, C. C.; Thomas, M.; Kaushik, R. S.; Wang, D.; Li, F. Influenza A in Bovine  
414 Species: A Narrative Literature Review. *Viruses* **2019**, *11* (6).  
415 <https://doi.org/10.3390/v11060561>.
- 416 (26) Brito, B.; Hick, P. Milk as a Diagnostic Fluid to Monitor Viral Diseases in Dairy Cattle.  
417 *Aust. Vet. J.* **2024**, *102* (1–2), 11–18. <https://doi.org/10.1111/avj.13293>.
- 418 (27) U.S. DEPARTMENT OF AGRICULTURE.  
419 *Detection of Highly Pathogenic Avian Influenza (H5N1) in Dairy Herds: Frequently Asked Q  
420 uestions*; 2024. <https://www.aphis.usda.gov/sites/default/files/hpai-dairy-faqs.pdf> (accessed  
421 2024-04-25).
- 422 (28) U.S. Food & Drug Administration. *Updates on Highly Pathogenic Avian Influenza (HPAI)*.  
423 [https://www.fda.gov/food/alerts-advisories-safety-information/updates-highly-pathogenic-  
424 avian-influenza-hpai](https://www.fda.gov/food/alerts-advisories-safety-information/updates-highly-pathogenic-avian-influenza-hpai) (accessed 2024-04-25).
- 425 (29) Youk, S.; Torchetti, M. K.; Lantz, K.; Lenocho, J. B.; Killian, M. L.; Leyson, C.; Bevins, S.  
426 N.; Dilione, K.; Ip, H. S.; Stallknecht, D. E.; Poulson, R. L.; Suarez, D. L.; Swayne, D. E.;  
427 Pantin-Jackwood, M. J. H5N1 Highly Pathogenic Avian Influenza Clade 2.3.4.4b in Wild and  
428 Domestic Birds: Introductions into the United States and Reassortments, December 2021–  
429 April 2022. *Virology* **2023**, *587*, 109860. <https://doi.org/10.1016/j.virol.2023.109860>.

430

431

432
